# Supplementary material
Source: Springer Nature journal article supplement (https://www.springermedizin.de/resource/supplementary/13063_2011_709_MOESM2_ESM.pdf/9618524)

Z (# observed - expected successes)

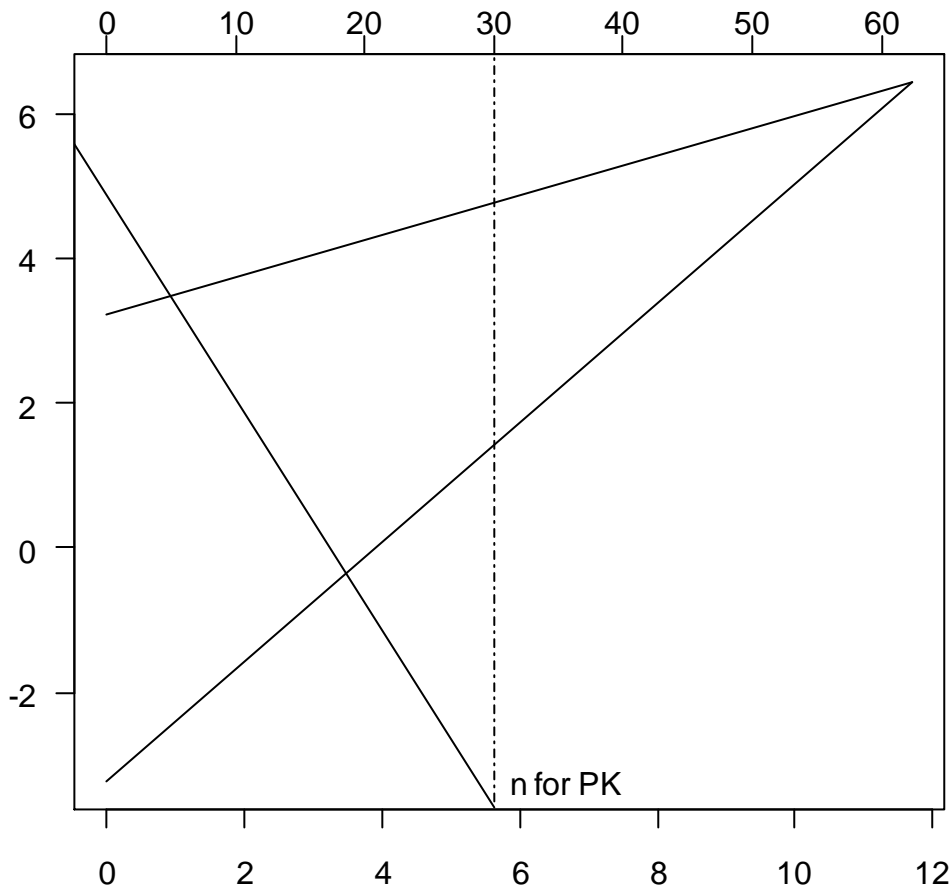

V (lower horizontal axis) and N (upper horizontal axis)

Supplement: MOESM2 [file 9618524]
